# Supplementary material for: The burden and challenges of tuberculosis in China: findings from the Global Burden of Disease Study 2015
Source: PubMed Central journal article supplement (PMC5668247; doi:10.1038/s41598-017-15024-1), 2017-11-03
Supplement: 41598_2017_15024_MOESM1_ESM.pdf [file 41598_2017_15024_MOESM1_ESM.pdf]

## The burden and challenges of tuberculosis in China: findings from the Global Burden of Disease Study 2015

Sui Zhu<sup>1</sup>, Lan Xia<sup>2</sup>, Shicheng Yu<sup>3</sup>, Saobing Chen<sup>1</sup>, Juying Zhang<sup>1\*</sup>

<sup>1</sup> Department of Epidemiology and Biostatistics, West China School of Public Health, Sichuan University, Sichuan 610044, China;

<sup>2</sup> Sichuan Provincial Center for Disease Control and Prevention, Chengdu, P.R. China;

<sup>3</sup> Office of Epidemiology, Chinese Center for Disease Control and Prevention, Beijing, P.R. China.

**Supplementary Table S1. TB mortality by age-sex from 1990 to 2015 in China (per 100,000 persons, 95% UI).**

| Age-sex           | 1990                 | 1995                | 2000               | 2005               | 2010              | 2015               | % Δ<br>(1990-2015) |
|-------------------|----------------------|---------------------|--------------------|--------------------|-------------------|--------------------|--------------------|
| <b>Both Sexes</b> |                      |                     |                    |                    |                   |                    |                    |
| under 5           | 2.61(1.43-3.56)      | 1.62(1.07-2.32)     | 1.31(0.83-1.65)    | 0.75(0.49-0.92)    | 0.36(0.27-0.54)   | 0.22(0.16-0.36)    | -91.66             |
| 5-14 years        | 1.28(0.89-1.54)      | 0.82(0.61-1.04)     | 0.61(0.46-0.77)    | 0.36(0.28-0.44)    | 0.27(0.21-0.35)   | 0.16(0.13-0.21)    | -87.71             |
| 15-49 years       | 6.87(5.27-8.21)      | 5.51(4.35-6.92)     | 3.92(3.10-4.93)    | 2.68(2.08-3.43)    | 1.75(1.46-2.42)   | 1.26(1.05-1.8)     | -81.59             |
| 50-69 years       | 42.46(29.2-52.11)    | 29.27(21.71-37.29)  | 20.44(16.08-26.24) | 13.58(10.87-18.31) | 8.34(7.26-12.64)  | 6.24(5.18-9.78)    | -85.3              |
| 70+ years         | 128.55(87.74-171.57) | 93.99(71.01-124.85) | 69.05(55.28-91.77) | 49.78(41.4-68.71)  | 32.9(28.49-51.86) | 24.21(20.08-39.77) | -81.17             |
| All ages          | 13.82(9.99-17.02)    | 10.44(8.01-13.02)   | 8.08(6.45-10.36)   | 6.31(5.15-8.47)    | 4.43(3.87-6.62)   | 3.54(2.97-5.52)    | -74.42             |
| Age-standardized  | 20.96(14.81-26.26)   | 14.86(11.4-18.79)   | 10.62(8.48-13.71)  | 7.48(6.19-10.14)   | 4.74(4.17-7.18)   | 3.4(2.86-5.37)     | -83.79             |
| <b>Male</b>       |                      |                     |                    |                    |                   |                    |                    |
| under 5           | 3.74(2.16-5.92)      | 2.46(1.63-3.82)     | 2.15(1.28-2.71)    | 1.24(0.75-1.55)    | 0.56(0.41-0.91)   | 0.33(0.24-0.61)    | -91.22             |
| 5-14 years        | 1.24(0.77-1.65)      | 0.84(0.54-1.18)     | 0.69(0.42-0.93)    | 0.38(0.25-0.51)    | 0.27(0.19-0.39)   | 0.16(0.12-0.24)    | -87.34             |
| 15-49 years       | 7.89(5.38-10.91)     | 6.57(4.81-9.19)     | 4.88(3.51-6.89)    | 3.49(2.47-4.94)    | 2.39(1.79-3.55)   | 1.78(1.36-2.76)    | -77.39             |

|                  |                      |                      |                     |                     |                    |                    |        |
|------------------|----------------------|----------------------|---------------------|---------------------|--------------------|--------------------|--------|
| 50-69 years      | 56.06(35.49-77.13)   | 39.41(26.40-55.03)   | 27.64(19.64-39.81)  | 18.85(13.88-27.09)  | 12.19(9.96-19.35)  | 9.36(7.62-15.49)   | -83.31 |
| 70+ years        | 178.90(119.7-266.36) | 130.07(91.03-196.69) | 97.67(70.88-142.78) | 72.51(53.32-108.36) | 49.42(39.54-80.88) | 36.81(29.73-62.41) | -79.43 |
| All ages         | 17.13(11.35-24.17)   | 13.16(9.30-18.84)    | 10.41(7.54-15.10)   | 8.42(6.21-12.03)    | 6.18(4.90-9.75)    | 5.04(4.06-8.19)    | -70.55 |
| Age-standardized | 28.06(18.47-40.85)   | 20.01(14.16-29.11)   | 14.58(10.59-20.91)  | 10.62(7.83-15.53)   | 7.01(5.61-11.19)   | 5.12(4.16-8.33)    | -81.76 |
| <b>Female</b>    |                      |                      |                     |                     |                    |                    |        |
| under 5          | 1.39(0.46-1.92)      | 0.68(0.35-0.86)      | 0.35(0.27-0.50)     | 0.19(0.14-0.25)     | 0.13(0.08-0.16)    | 0.09(0.05-0.12)    | -93.48 |
| 5-14 years       | 1.33(0.90-1.64)      | 0.79(0.58-1.04)      | 0.52(0.4-0.72)      | 0.34(0.26-0.44)     | 0.27(0.20-0.34)    | 0.16(0.11-0.21)    | -88.08 |
| 15-49 years      | 5.79(3.86-6.89)      | 4.40(3.20-5.34)      | 2.92(2.21-3.53)     | 1.83(1.39-2.23)     | 1.07(0.85-1.42)    | 0.71(0.57-1.03)    | -87.75 |
| 50-69 years      | 27.74(17.08-33.14)   | 18.27(12.25-21.20)   | 12.8(8.87-15.04)    | 8.06(6.15-10.24)    | 4.36(3.65-6.69)    | 3.06(2.36-4.99)    | -88.98 |
| 70+ years        | 88.77(52.68-114.22)  | 64.79(42.04-79.99)   | 45.26(33.13-57.75)  | 30.2(25.59-42.5)    | 18.3(15.22-30.87)  | 12.99(9.64-22.86)  | -85.37 |
| All ages         | 10.34(6.98-12.02)    | 7.57(5.40-8.81)      | 5.62(4.25-6.81)     | 4.07(3.33-5.35)     | 2.57(2.20-4.00)    | 1.94(1.51-3.15)    | -81.28 |
| Age-standardized | 14.73(9.64-17.42)    | 10.18(7.12-11.89)    | 7.00(5.22-8.47)     | 4.59(3.78-6.08)     | 2.64(2.25-4.17)    | 1.79(1.39-2.92)    | -87.84 |

TB: tuberculosis; UI: uncertainty intervals; %  $\Delta$  : the percent changes of death rate from 1990 to 2015.
