# Supplementary material for: The burden and challenges of tuberculosis in China: findings from the Global Burden of Disease Study 2015
Source: PubMed Central journal article supplement (PMC5668247; doi:10.1038/s41598-017-15024-1), 2017-11-03
Supplement: 41598_2017_15024_MOESM2_ESM.pdf [file 41598_2017_15024_MOESM2_ESM.pdf]

## The burden and challenges of tuberculosis in China: findings from the Global Burden of Disease Study 2015

Sui Zhu<sup>1</sup>, Lan Xia<sup>2</sup>, Shicheng Yu<sup>3</sup>, Saobing Chen<sup>1</sup>, Juying Zhang<sup>1\*</sup>

<sup>1</sup>Department of Epidemiology and Biostatistics, West China School of Public Health, Sichuan University, Sichuan 610044, China;

<sup>2</sup>Sichuan Provincial Center for Disease Control and Prevention, Chengdu, P.R. China;

<sup>3</sup>Office of Epidemiology, Chinese Center for Disease Control and Prevention, Beijing, P.R. China.

**Supplementary Table S2. Varied changes of PAFs of three risk factors in age-sex-specific from 1990 to 2015 in China.**

| Age         | Sex         | Smoking    |                  | Alcohol use |                | HFPG       |                |
|-------------|-------------|------------|------------------|-------------|----------------|------------|----------------|
|             |             | Change (%) | 95% UI           | Change (%)  | 95% UI         | Change (%) | 95% UI         |
| 15-49 years | Male        | -4.58      | -11.39 to 3.46   | 30.16       | 20.17 to 38.38 | 37.08      | 28.91 to 48.9  |
|             | Female      | -34.89     | -52.77 to -9.99  | 28.1        | 9.74 to 47.87  | 24.12      | 12.42 to 46.01 |
|             | <b>Both</b> | 1.97       | -11.1 to 19.84   | 38.87       | 21.33 to 55.82 | 35.78      | 26.43 to 52.79 |
| 50-69 years | Male        | -12.3      | -15.58 to -9.86  | 14.35       | 6.29 to 23.48  | 10.09      | 5.53 to 14.85  |
|             | Female      | -60.35     | -68.84 to -50.68 | 25.61       | 7.65 to 43.99  | 5.97       | -0.34 to 11.83 |
|             | <b>Both</b> | -10.88     | -21.33 to -3.77  | 20.54       | 6.33 to 32.5   | 8.9        | 4.28 to 13.63  |
| 70+ years   | Male        | -17.45     | -21.96 to -13.67 | 15.22       | 0.97 to 29.1   | 8.42       | 0.57 to 29.16  |
|             | Female      | -21.69     | -38.36 to 1.64   | 16.56       | 0.48 to 34.73  | 10.54      | 2.61 to 24.99  |
|             | <b>Both</b> | -11.73     | -22.82 to -3.42  | 23.94       | 6.33 to 42.01  | 8.59       | 1.24 to 26.38  |
| All ages    | Male        | -1.59      | -7.08 to 7.09    | 29.71       | 19.89 to 38.27 | 29.19      | 22.19 to 40.95 |
|             | Female      | -34.91     | -47.05 to -13.36 | 34.13       | 15.82 to 52.83 | 24.28      | 13.98 to 46.37 |
|             | <b>Both</b> | 3.33       | -10.73 to 17.85  | 38.38       | 19.9 to 53.04  | 28.98      | 21.35 to 44.13 |

|                  |             |        |                  |       |               |       |               |
|------------------|-------------|--------|------------------|-------|---------------|-------|---------------|
| Age-standardized | Male        | -14.59 | -18.81 to -8.65  | 19.52 | 9.69 to 28.43 | 13.11 | 7.56 to 20.85 |
|                  | Female      | -48.12 | -57.71 to -31.59 | 20.58 | 5.05 to 38.01 | -0.09 | -7.76 to 14.8 |
|                  | <b>Both</b> | -12.98 | -24.27 to -2.41  | 24.05 | 7.90 to 37.32 | 9.3   | 3.40 to 19.53 |

---

PAFs: population attributable fractions; UI: uncertainty intervals; HFGP: high fasting plasma glucose.
